# Supplementary material for: Cobalt lawsone complexes: searching for new valence tautomers
Source: Royal Society of Chemistry journal article supplement (doi:10.1039/c3dt32968b), 2013-01-01

## Supporting Information

This document contains the Infrared spectra, Electronic Paramagnetic Resonance (EPR) spectra, calculated parameters for lawsone and lawsonate and figures of crystal structure with different representation of five compounds.

**Infrared spectra** – Except by the compound 2 all of spectra were collected on Perkin-Elmer FTIR spectrum GX using KBr pellets in the range of 4000-400  $\text{cm}^{-1}$  with 4 $\text{cm}^{-1}$  of resolution. The compound 2 spectrum was collected on FTIR Perkin-Elmer One.

- Lawsone or 2-hydroxy-1,4-naphthoquinone

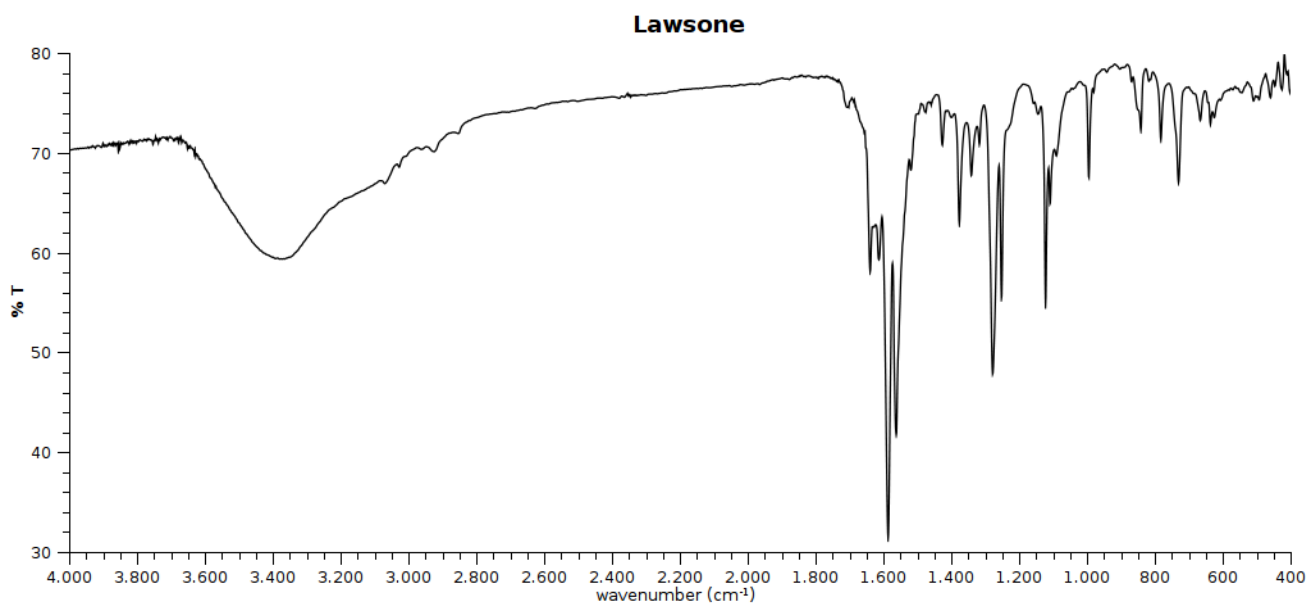

- Compound 1 -  $[\text{Co}(\text{Law})_2(\text{Im})_2] \cdot \text{C}_6\text{H}_5\text{CH}_3$

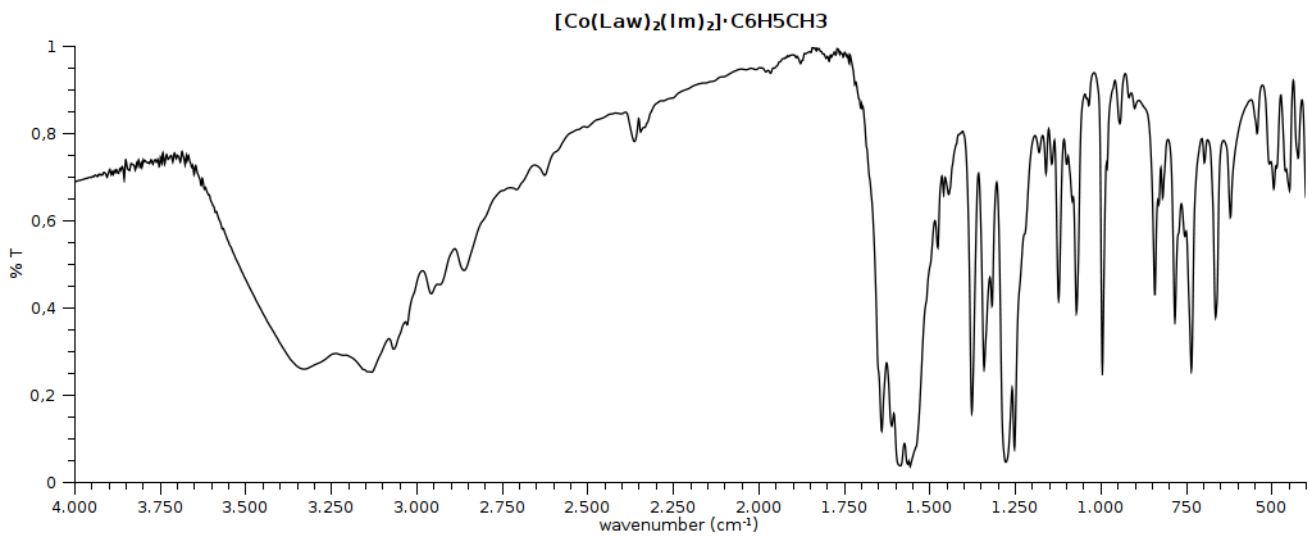

- Compound 2 -  $[\text{Co}(\text{law})_2(\text{py})_2] \cdot \text{CH}_3\text{OH}$

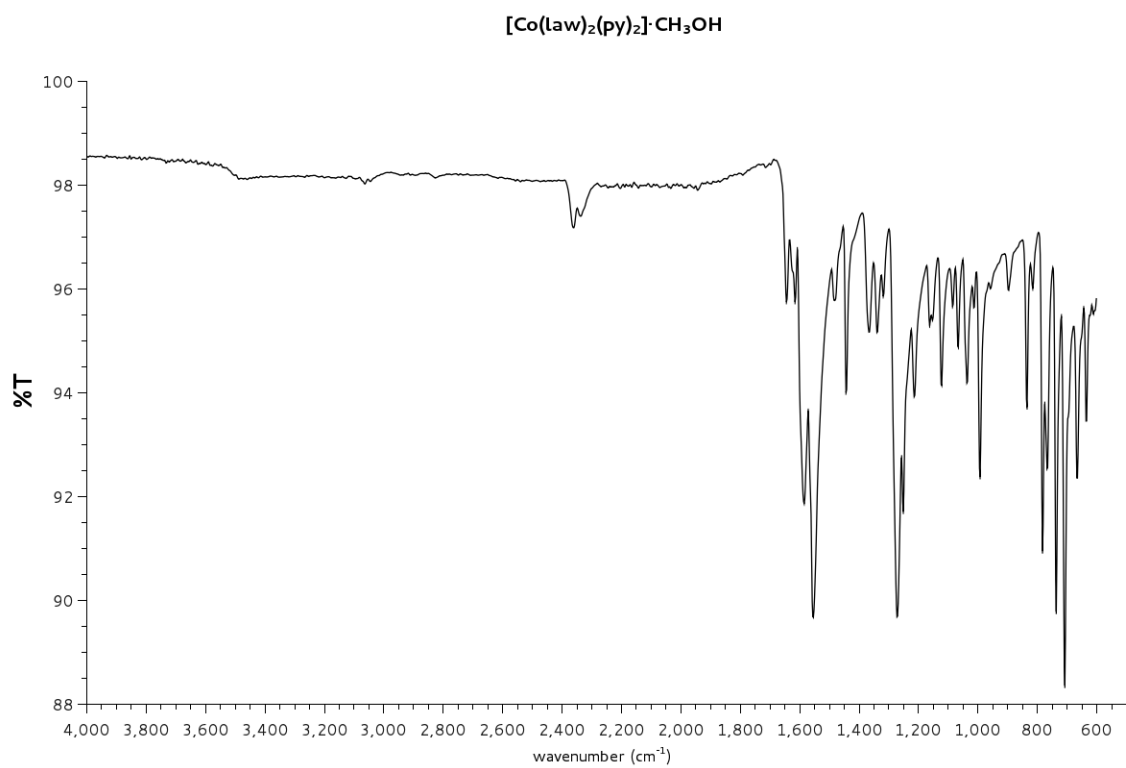

- Compound 3 -  $[\text{Co}(\text{Law})_2(\text{Phen})] \cdot 2(\text{C}_4\text{H}_8\text{O})$

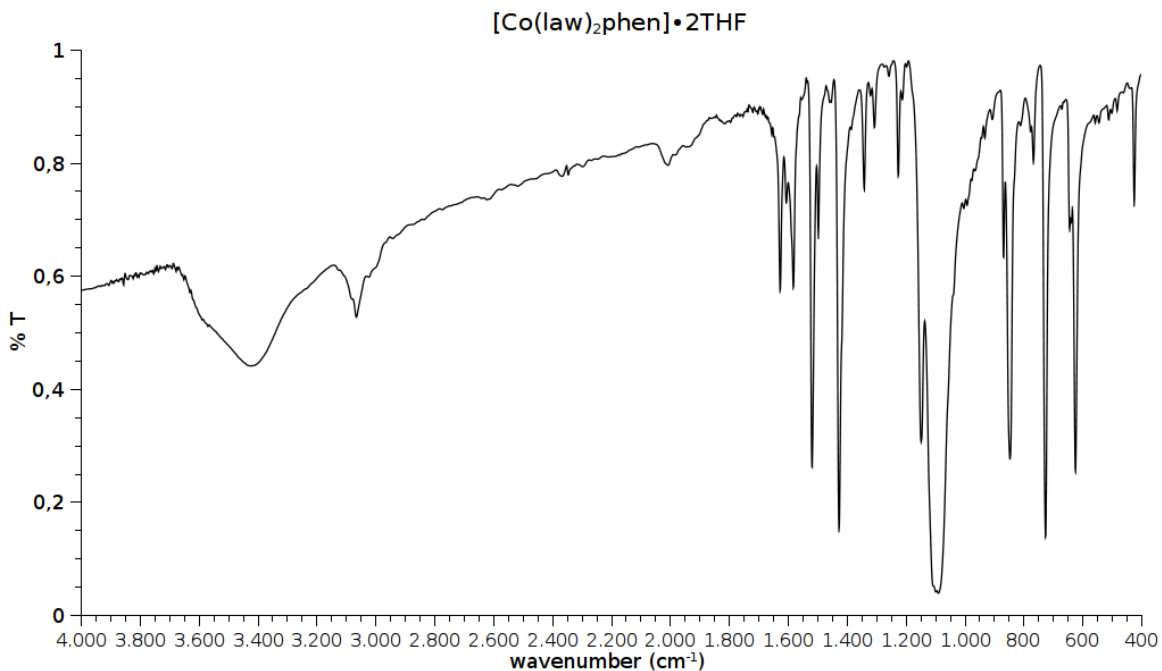

- [Co(Law)<sub>2</sub>(2,2-bpy)]

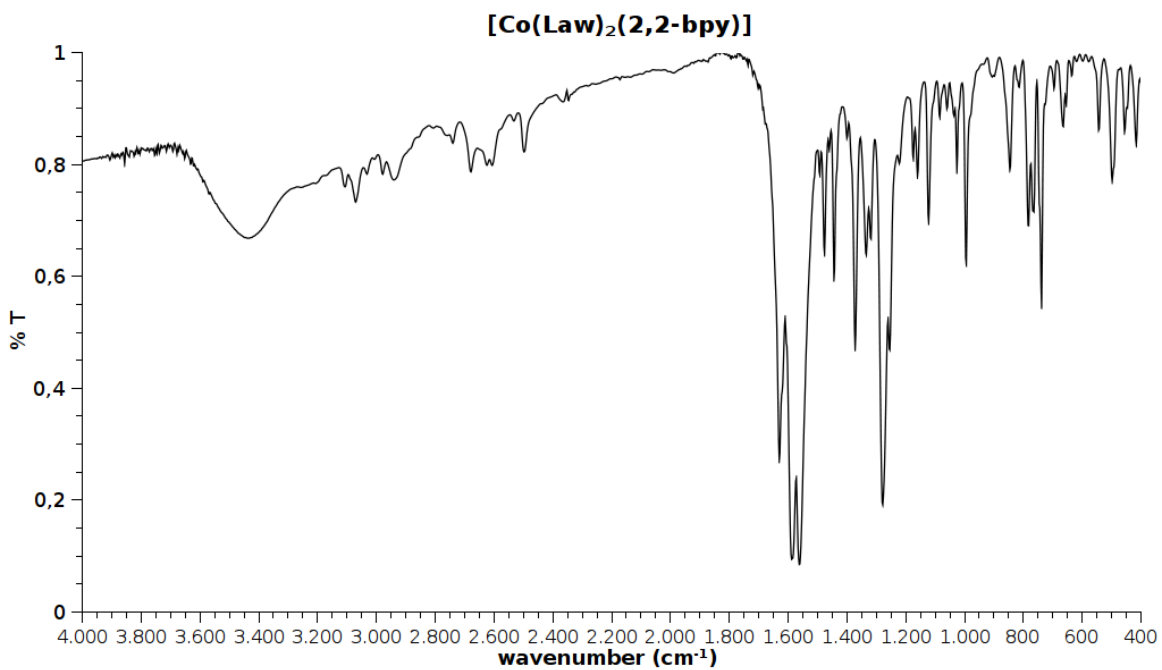

**Computational Methods** - Ab initio calculations were performed with Firefly QC Package,<sup>i,ii</sup> using DFT with base functions B3LYP/6-31+G. The optimization geometry of both the neutral

lawsone and lawsonate, were carried out. The following figures presents the bond lengths and bond angles in both structures.

---

i Alex A. Granovsky, Firefly version 7.1.G, [www.http://classic.chem.msu.su/gran/firefly/index.html](http://classic.chem.msu.su/gran/firefly/index.html)  
ii M.W.Schmidt, K.K.Baldrige, J.A.Boatz, S.T.Elbert, M.S.Gordon, J.H.Jensen, S.Koseki, N.Matsunaga, K.A.Nguyen, S.Su, T.L.Windus, M.Dupuis, J.A.Montgomery J.Comput.Chem. 14, 1347-1363 (1993).

- Optimized Lawsone structure

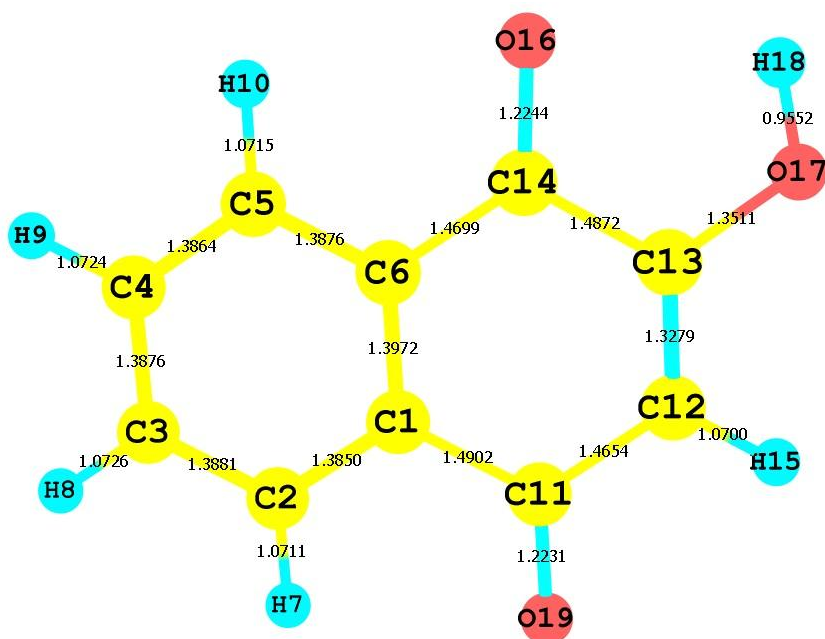

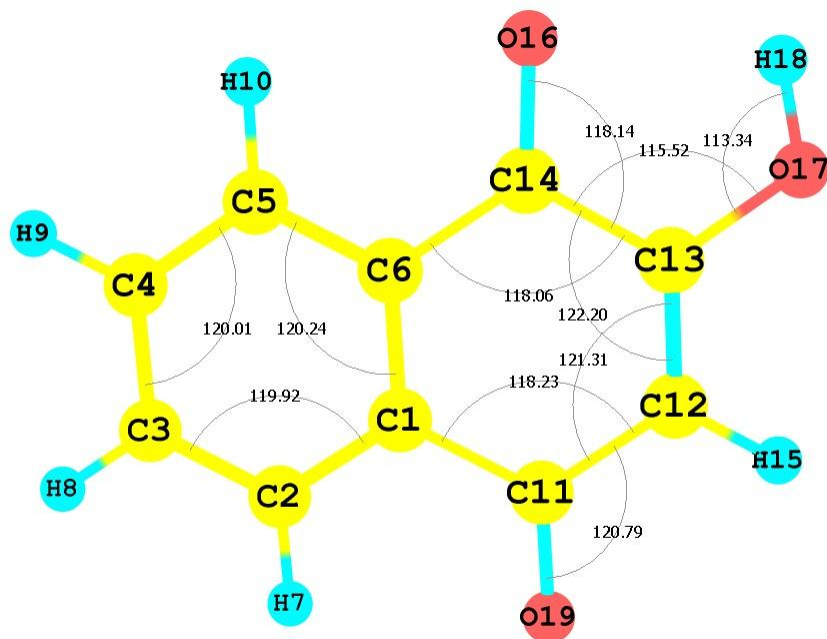

- Optimized Lawsonate structure

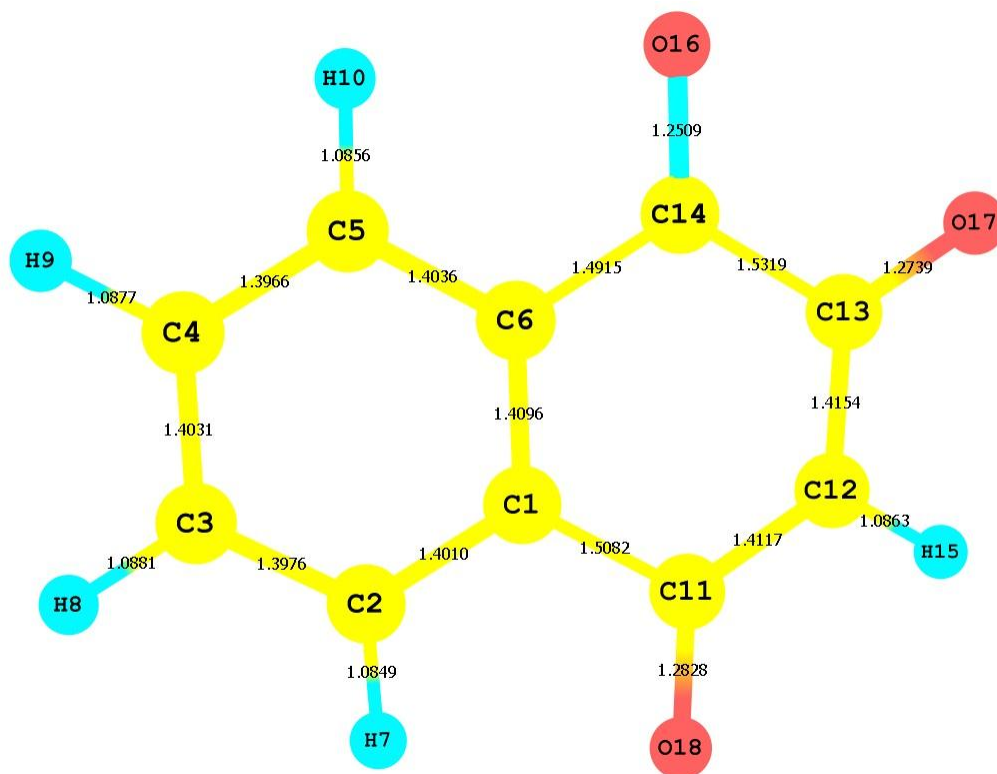

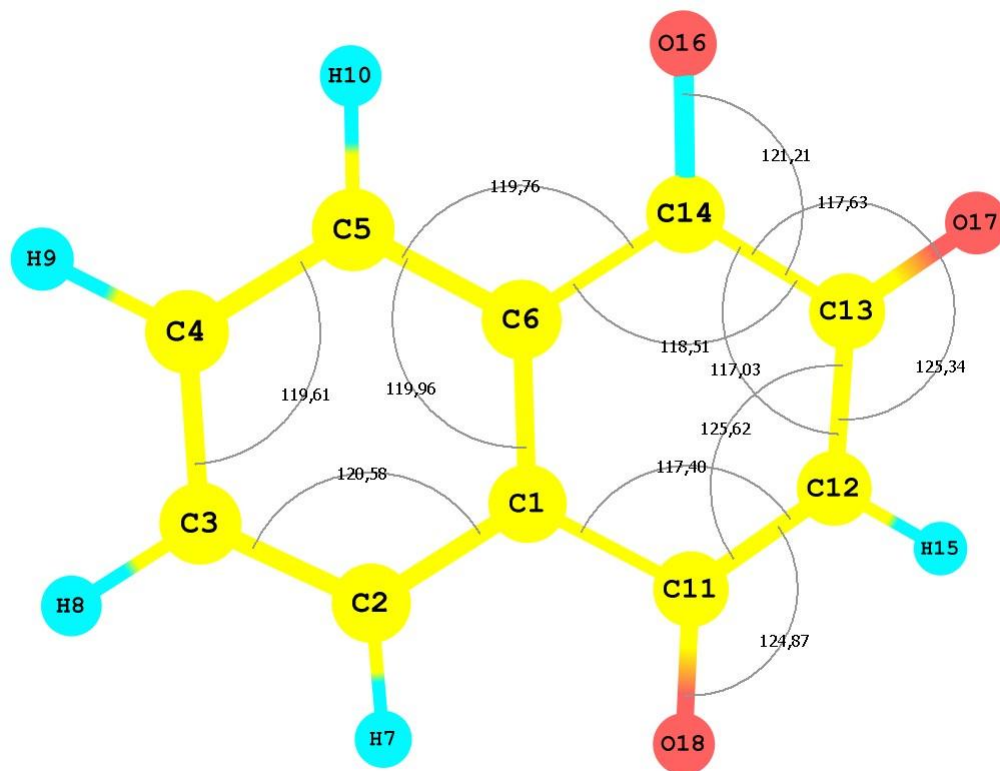

Supplement: c3dt32968b.pdf [file c3dt32968b.pdf]
